# Supplementary material for: Effect of E. cava and C. indicum Complex Extract on Phorbol 12-Myristate 13-Acetate (PMA)-Stimulated Inflammatory Response in Human Pulmonary Epithelial Cells and Particulate Matter (PM)2.5-Induced Pulmonary Inflammation in Mice
Source: MDPI journal article supplement (doi:10.3390/pharmaceutics15112621), 2023-11-13

# Original Images for Blots/Gels

Supplementary Figure S1. Original photographs for the blots of each protein marker of Figure 3(A-B).

**Figure 3**

**(A)**

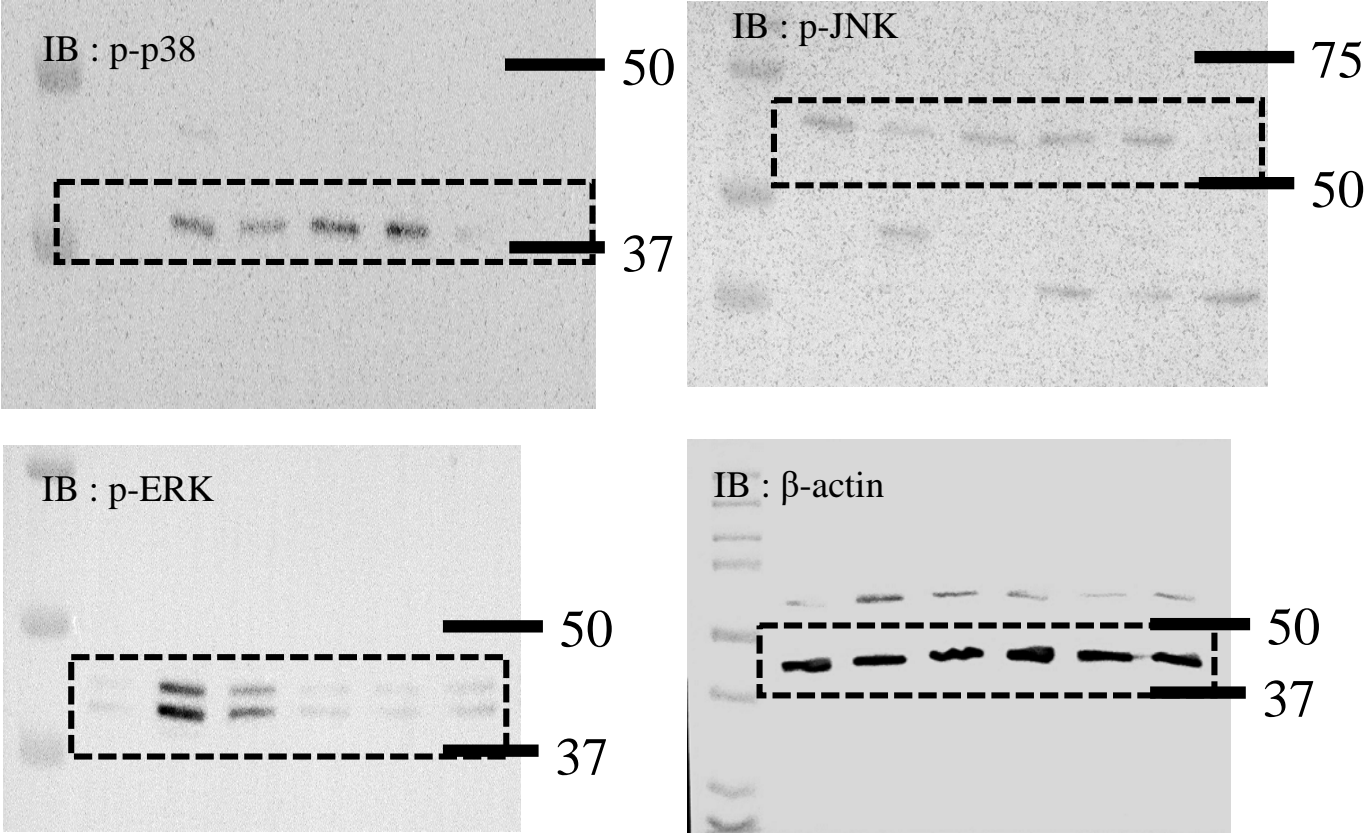

**(B)**

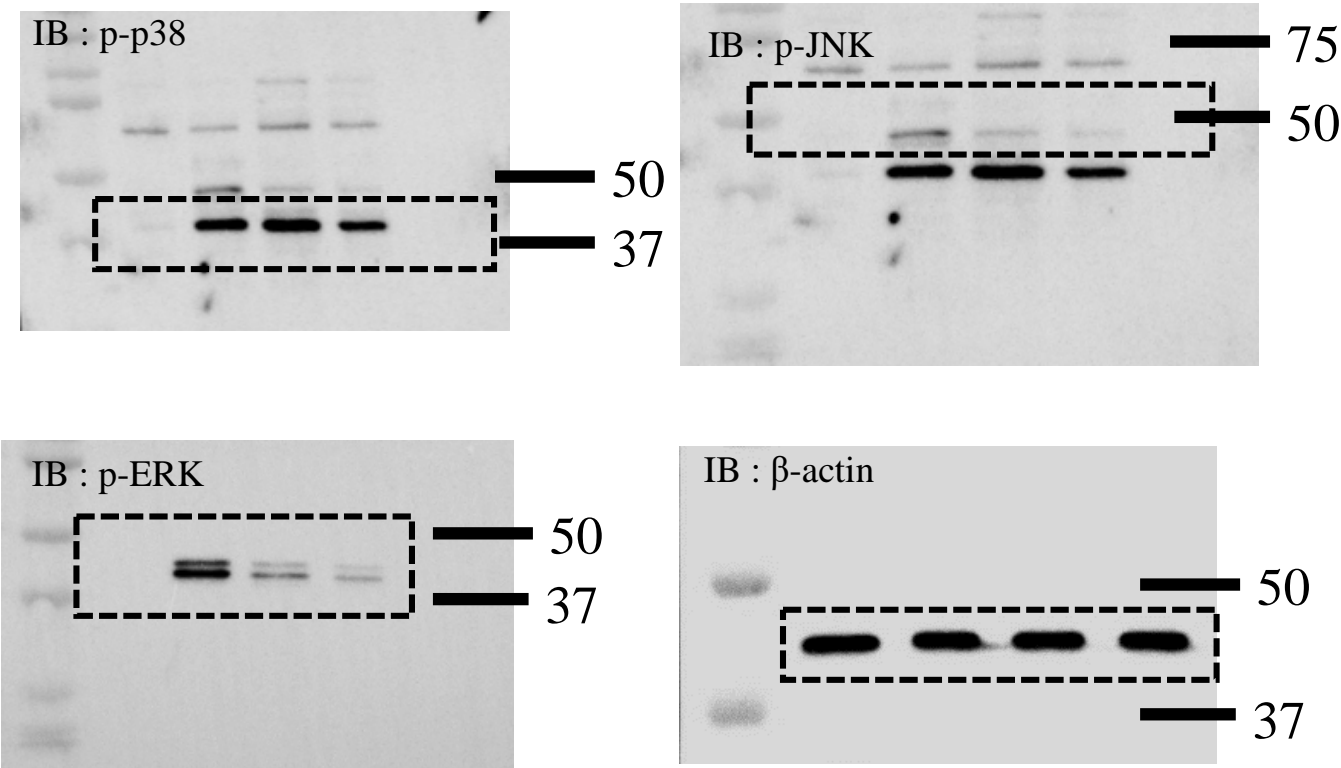

Supplement: s1 [file s1]
